# Supplementary material for: Two spirobifluorene-based fluorescent probes with aggregation-induced emission properties: synthesis and application in the detection of Zn2+ and cell imaging
Source: Royal Society of Chemistry journal article supplement (doi:10.1039/c8tc05526b), 2019-01-01
Supplement: c8tc05526b1.pdf [file c8tc05526b1.pdf]

## Supplementary material

### **Two spirobifluorene-based fluorescent probes with aggregation-induced emission properties: synthesis and application in the detection of $\text{Zn}^{2+}$ and cell imaging**

Jianyong Wan<sup>†</sup>, Wu Zhang<sup>†</sup>, Hongda Guo, JingJing Liang, Danyu Huang, Haibo Xiao\*

*Department of Chemistry, Shanghai Normal University, Shanghai 200234, P R China*

\*E-mail address: xiaohb@shnu.edu.cn

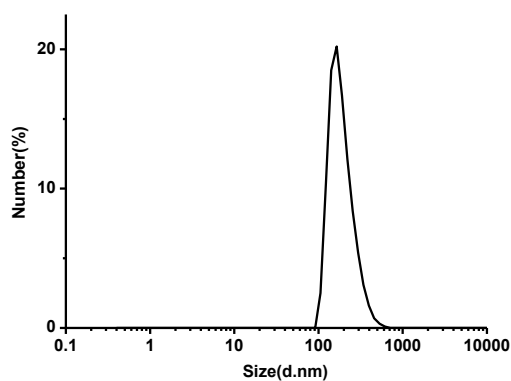

**Fig.S1.** DLS profiles of **SPF-1**( 50 $\mu$ M) in DMF / water mixtures (40% water in volume).

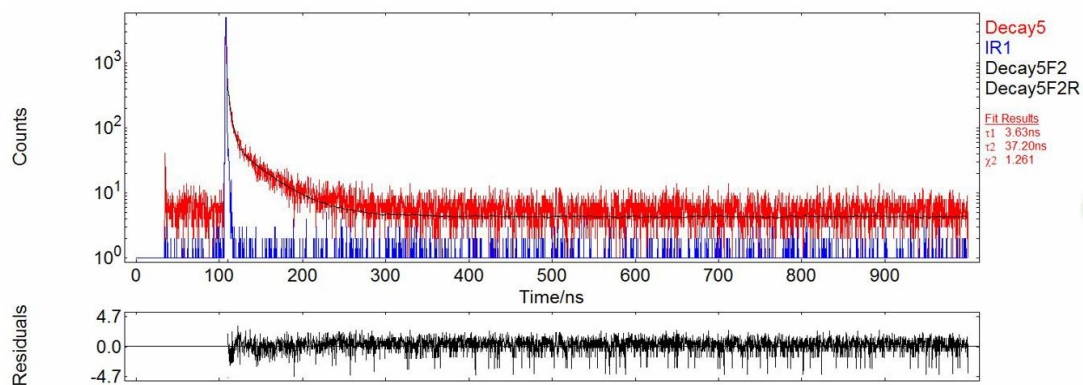

**Fig S2.** The time-resolved fluorescence decay behaviours of **SPF-1**.

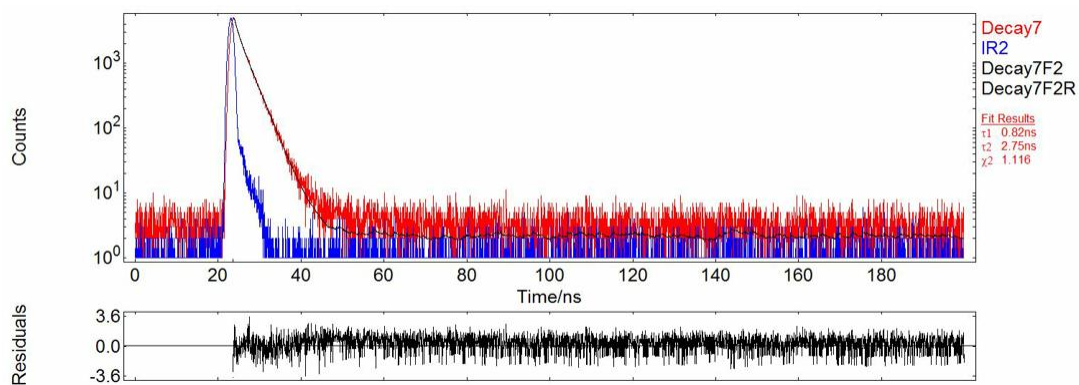

**Fig S3.** The time-resolved fluorescence decay behaviours of **SPF-2**.

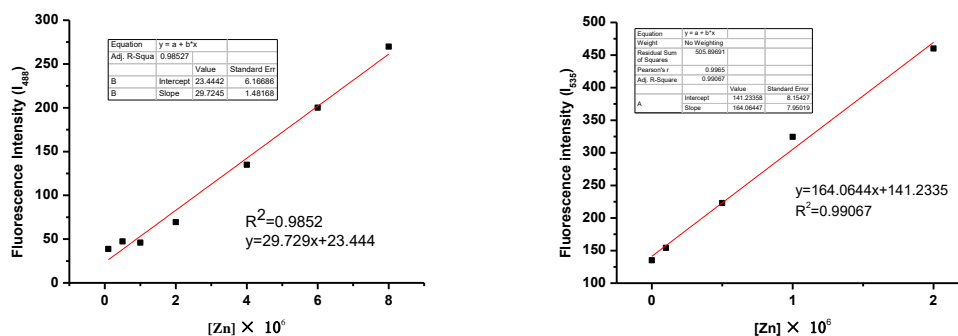

**Fig. S4.** The fluorescence intensity ( $I_{488}$ ) of **SPF-1** DMF/H<sub>2</sub>O solution (9:1, v/v, 10 μM) as a function of Zn<sup>2+</sup> concentration in the range of 0.5 μM to 20 μM (left). The fluorescence intensity ( $I_{535}$ ) of **SPF-2** 1,4-dioxane/water (13/7, v/v, 10 μM) as a function of Zn<sup>2+</sup> concentration in the range of 0 M to 4 μM (right).

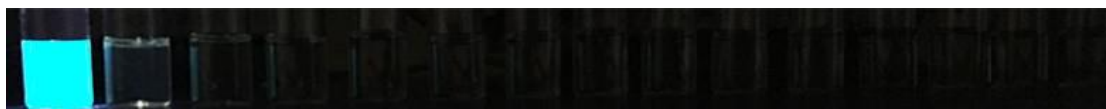

**Fig. S5.** The photograph of **SPF-1** solution (10 μM) in the presence of various metal ions (from left to right: Zn<sup>2+</sup>, Ag<sup>+</sup>, Al<sup>3+</sup>, Ba<sup>2+</sup>, Cd<sup>2+</sup>, Co<sup>2+</sup>, Cu<sup>2+</sup>, Fe<sup>3+</sup>, Hg<sup>2+</sup>, Li<sup>+</sup>, Mg<sup>2+</sup>, Mn<sup>2+</sup>, Ni<sup>2+</sup>, Pb<sup>2+</sup>) under the UV light (365 nm).

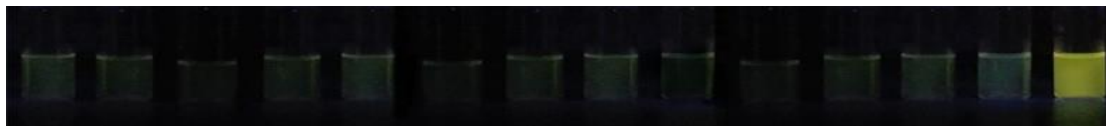

**Fig. S6.** The photograph of **SPF-2** solution (10 μM) in the presence of various metal ions (from left to right: Ag<sup>+</sup>, Al<sup>3+</sup>, Ba<sup>2+</sup>, Cd<sup>2+</sup>, Co<sup>2+</sup>, Cu<sup>2+</sup>, Fe<sup>3+</sup>, Hg<sup>2+</sup>, Li<sup>+</sup>, Mg<sup>2+</sup>, Mn<sup>2+</sup>, Ni<sup>2+</sup>, Pb<sup>2+</sup>, Zn<sup>2+</sup>) under the UV light (365 nm).

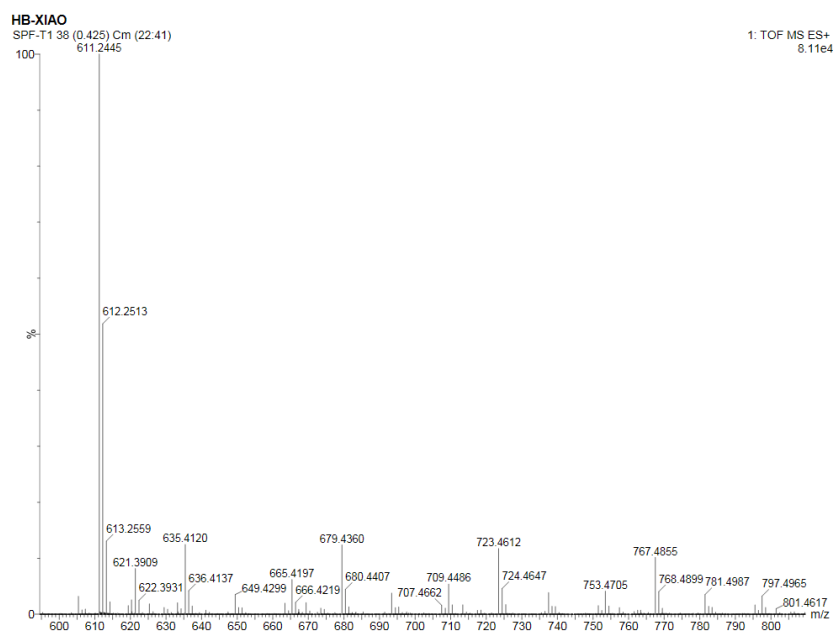

**Fig S7.** HRMS spectrum of the reaction mixture of probe **SPF-1** with  $\text{Zn}^{2+}$ .

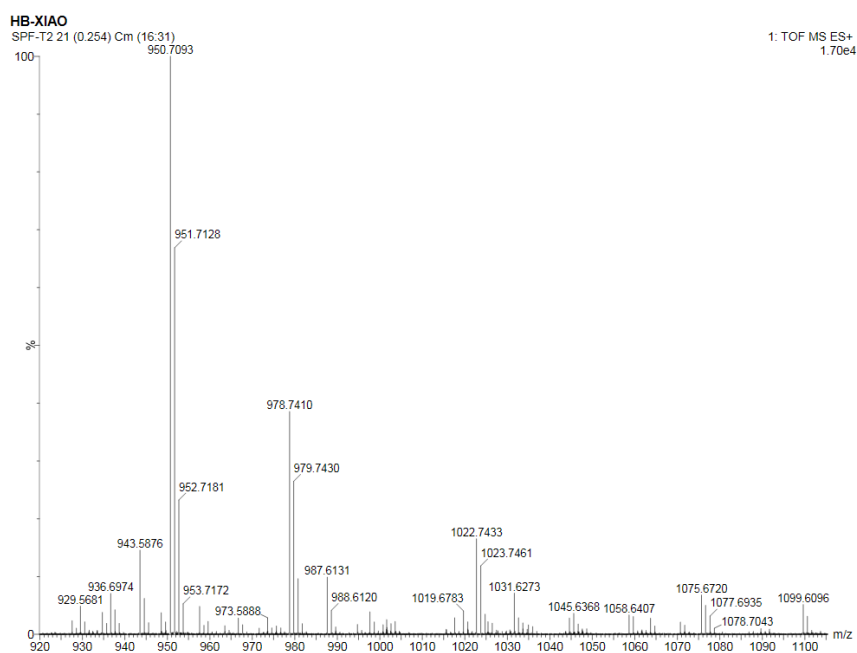

**Fig S8.** HRMS spectrum of the reaction mixture of probe **SPF-2** with  $\text{Zn}^{2+}$ .

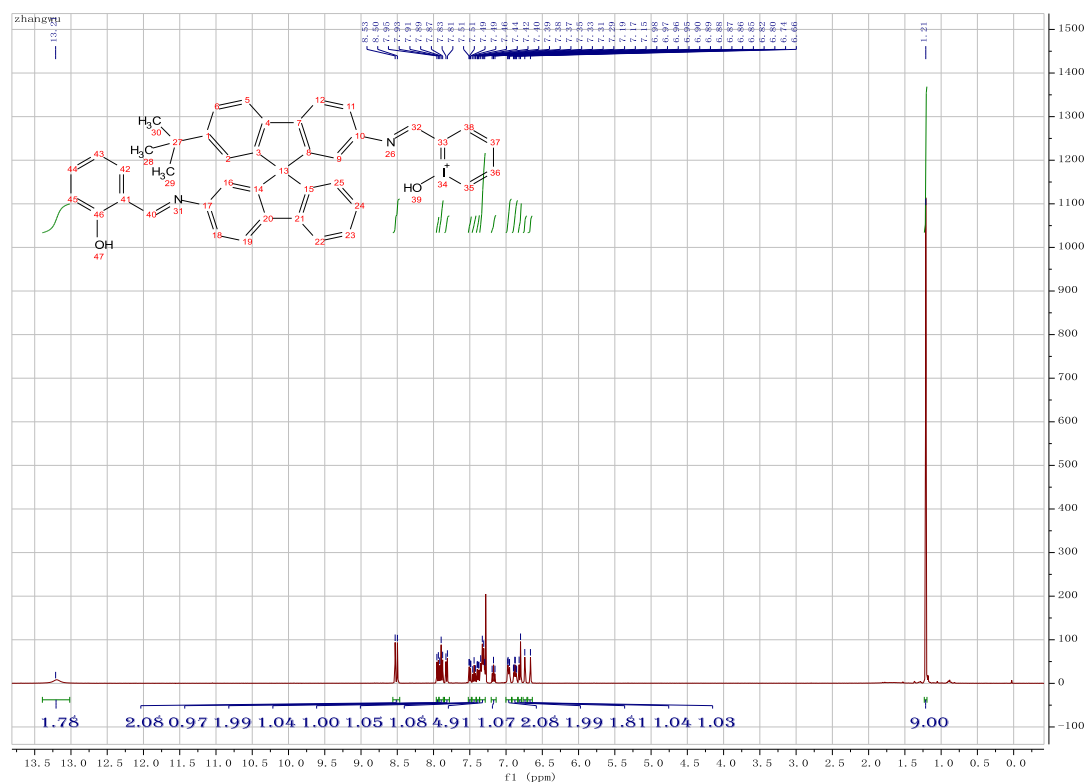

**Fig S9.**  $^1\text{H}$ -NMR spectrum of **SPF-1** in CDCl<sub>3</sub>.

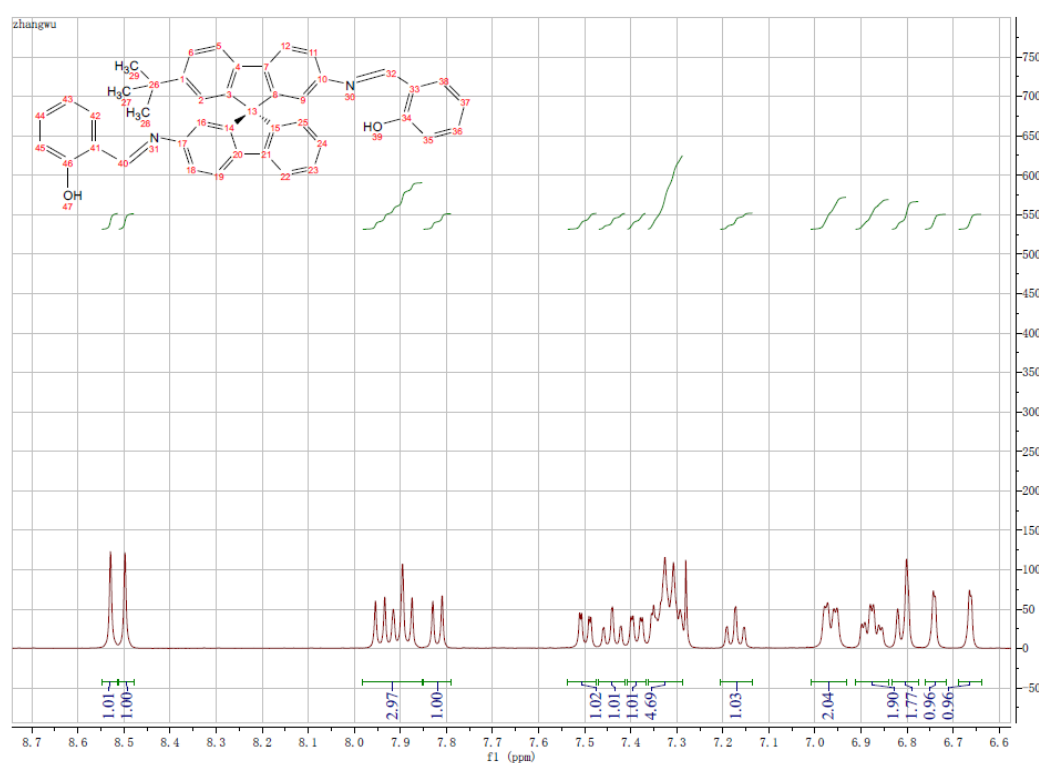

**Fig S10.** Partial  $^1\text{H}$ -NMR spectrum of **SPF-1** in CDCl<sub>3</sub>.

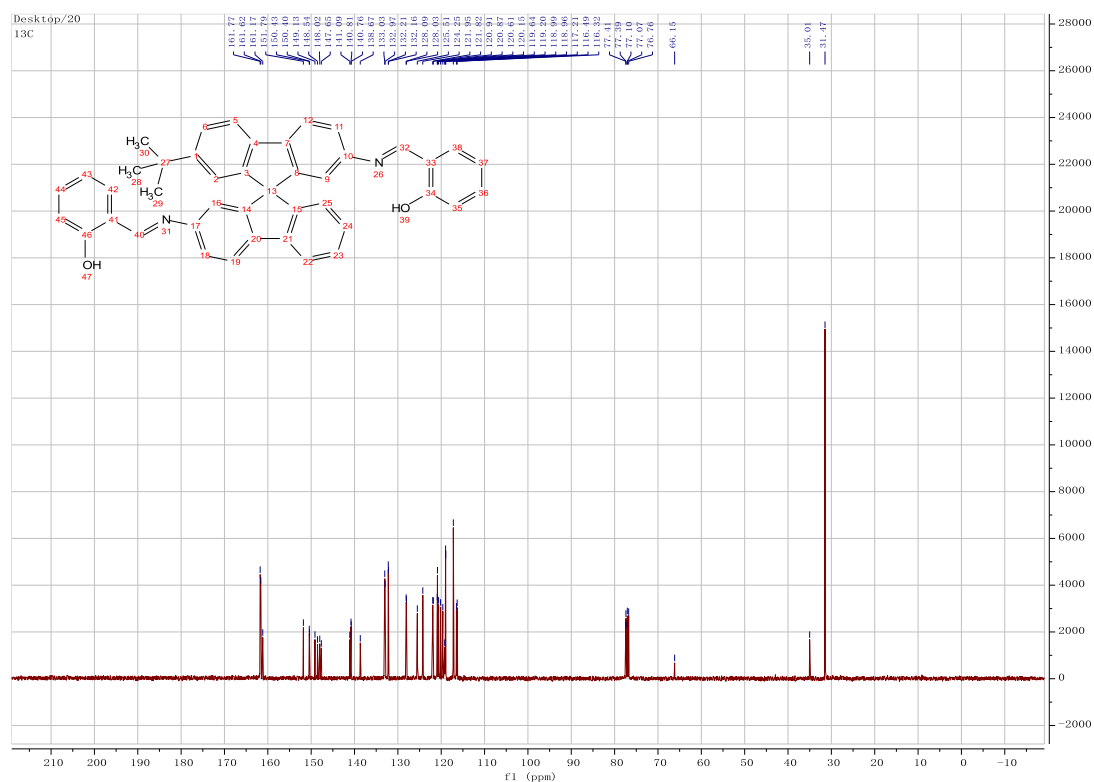

**Fig S11.**  $^{13}\text{C}$ -NMR spectrum of **SPF-1** in  $\text{CDCl}_3$ .

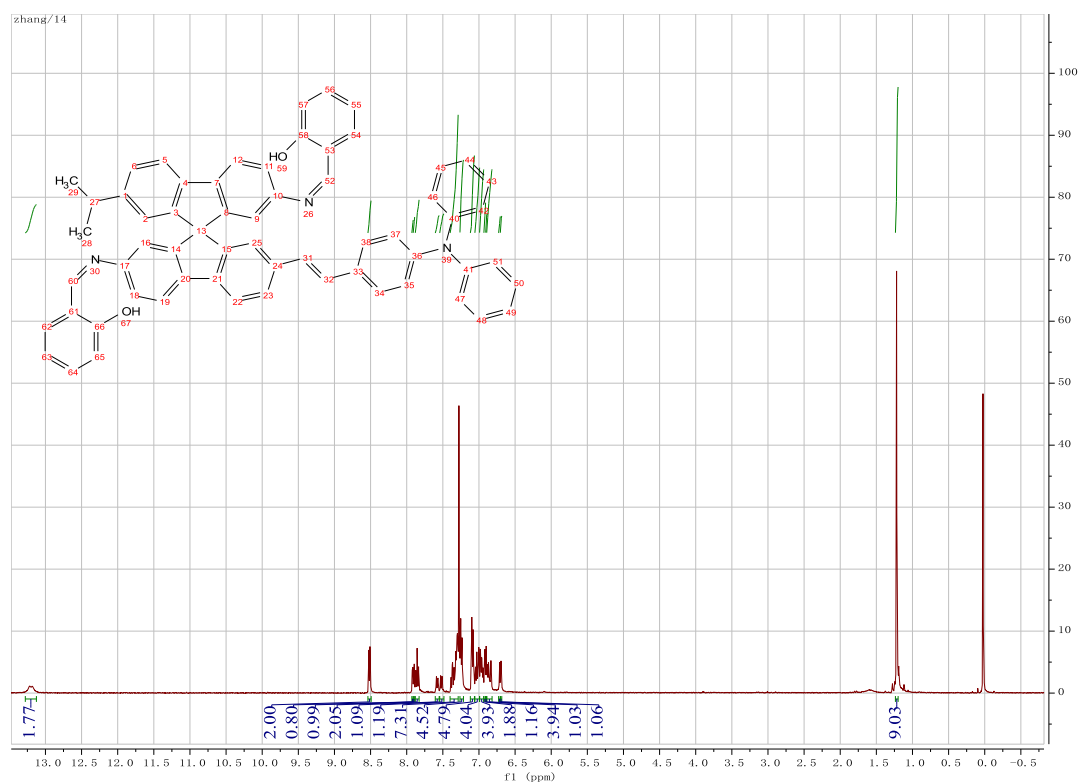

**Fig S12.**  $^1\text{H}$ -NMR spectrum of **SPF-2** in  $\text{CDCl}_3$ .

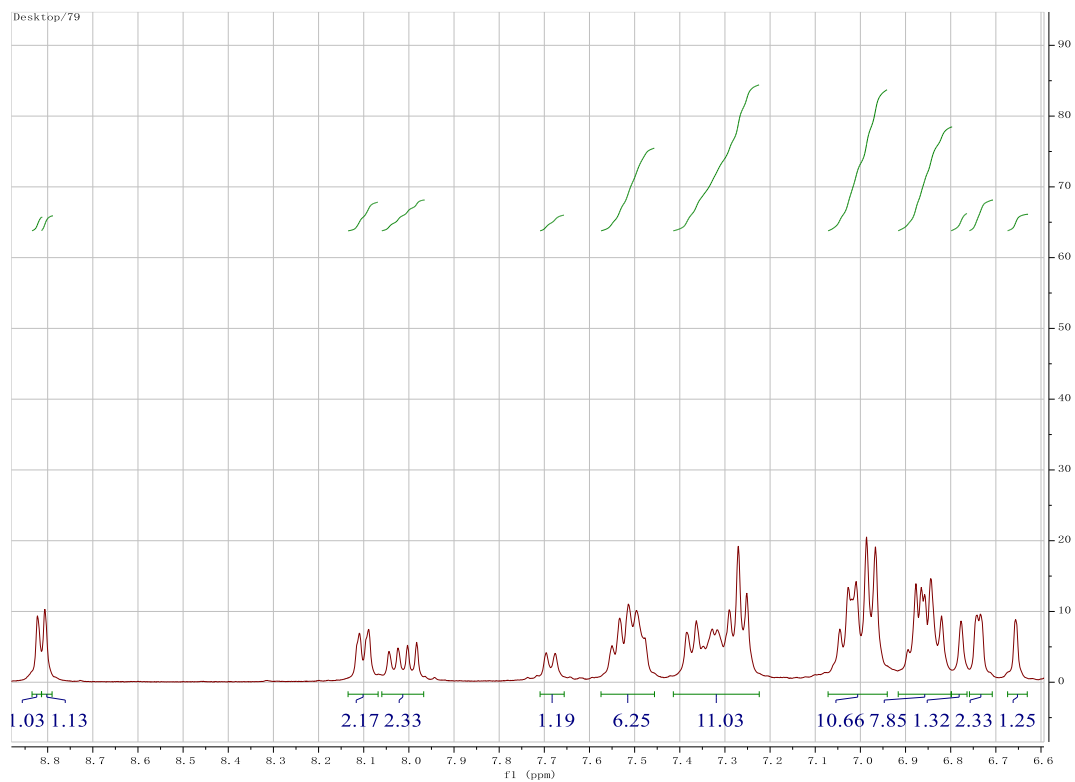

**Fig S13.** Partial  $^1\text{H}$ -NMR spectrum of **SPF-2** in  $\text{CDCl}_3$ .

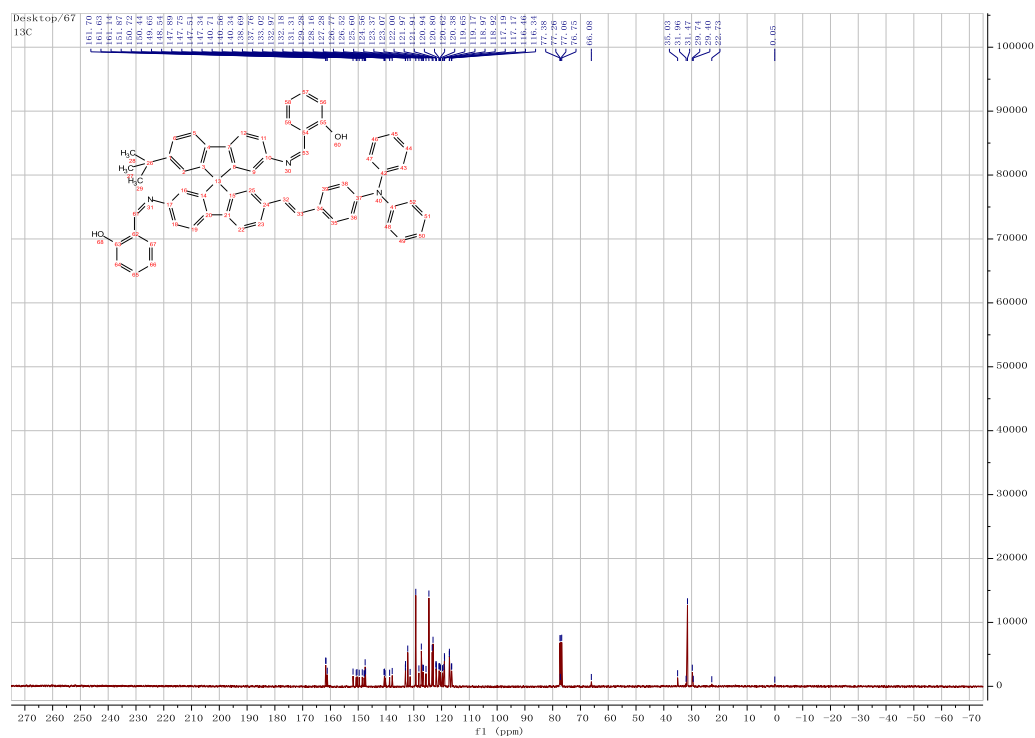

**Fig S14.**  $^{13}\text{C}$ -NMR spectrum of **SPF-2** in  $\text{CDCl}_3$ .
